# Supplementary material for: The role of extracellular vesicle fusion with target cells in triggering systemic inflammation
Source: PubMed Central journal article supplement (PMC10850166; doi:10.1038/s41467-024-45125-1), 2024-02-07
Supplement: 41467_2024_45125_MOESM1_ESM.pdf [file 41467_2024_45125_MOESM1_ESM.pdf]

## The Role of Extracellular Vesicle Fusion with Target Cells in Triggering Systemic Inflammation

Praveen Papareddy<sup>1</sup>, Ines Tapken<sup>1,2,3</sup>, Keshia Kroh<sup>1,4</sup>, Ravi Kiran Varma Bhongir<sup>1</sup>, Milladur Rahman<sup>5</sup>, Maria Baumgarten<sup>1</sup>, Eda Irem Cim<sup>1</sup>, Lilla Györfy<sup>1</sup>, Emanuel Smeds<sup>1</sup>, Ariane Neumann<sup>1</sup>, Srinivas Veerla<sup>6</sup>, Jon Olinder<sup>7</sup>, Henrik Thorlacus<sup>5</sup>, Cecilia Ryden<sup>7</sup>, Eva Bartakova<sup>8</sup>, Michal Holub<sup>8</sup>, and Heiko Herwald<sup>1</sup>

<sup>1</sup>Division of Infection Medicine, Department of Clinical Sciences, Lund, Lund University, Sweden

<sup>2</sup>SMATHERIA gGmbH – Non-Profit Biomedical Research Institute, Hannover, Germany

<sup>3</sup>Center for Systems Neuroscience (ZSN), Hannover, Germany

<sup>4</sup>Department of Viroscience, Erasmus Medical Center, Rotterdam, the Netherlands

<sup>5</sup>Section of Surgery, Department of Clinical Sciences, Malmö, Lund University, Sweden

<sup>6</sup>Division of Oncology and Pathology, Lund, Department of Clinical Sciences, Lund University, Lund, Sweden

<sup>7</sup>Division of Infection Medicine, Helsingborg Hospital and Department of Clinical Sciences Helsingborg, Lund University, Sweden

<sup>8</sup>Department of Infectious Diseases, First Faculty of Medicine, Charles University and Military University Hospital Prague, Czech Republic

### Running Title:

Systematic action of extracellular vesicles -mediated cell stimulation

### Corresponding authors:

Heiko Herwald, Division of Infection Medicine, Department of Clinical Sciences, Lund, Lund University, Biomedical Center, Tornavägen 10, SE-22184 Lund, Sweden.

Email: [heiko.hewald@med.lu.se](mailto:heiko.hewald@med.lu.se)

Phone: +46-46-2224182

Praveen Papareddy, Division of Infection Medicine, Department of Clinical Sciences, Lund, Lund University, Biomedical Center, Tornavägen 10, SE-22184 Lund, Sweden.

Email: [praveen.papareddy@med.lu.se](mailto:praveen.papareddy@med.lu.se)

Phone: +46-46-2226808

Supplemental Fig. 1

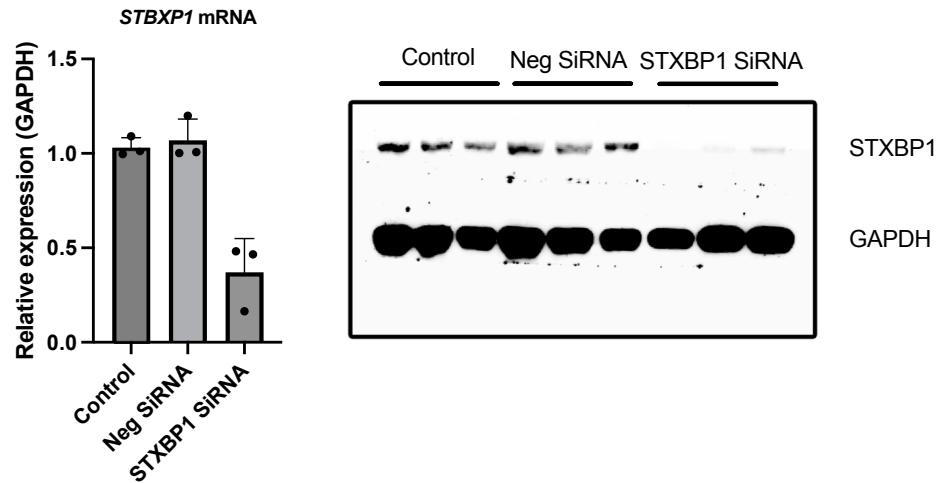

**Supplementary Figure 1:** Expression of *Stxbp1* in SiRNA treatment mice. P-values determined by ordinary one-way ANOVA with Tukey's multiple comparisons test (SEM;  $n=3$ , mice per group).

Supplemental Figure 2

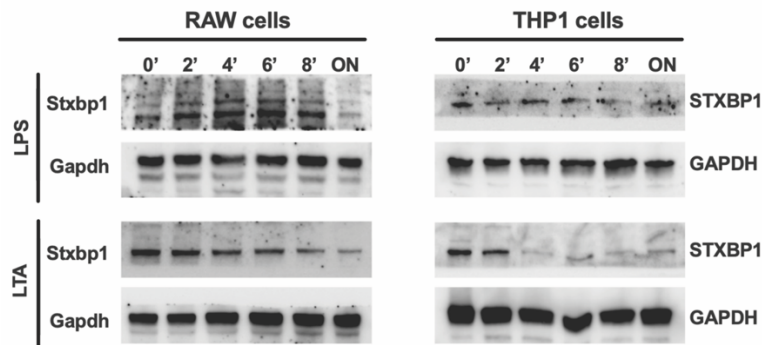

**Supplementary Figure 2:** Raw macrophages and THP1 were stimulated with LPS and LTA. Following the stimulation, *Stxbp1* expression levels were determined at 0 h, 2 h, 4 h, 6 h, 8 h and overnight, with 0 h as a negative control. *Stxbp1* expression levels are compared to GAPDH levels. Data represent a representative experiment from two independent experiments.

### Supplemental figure 3

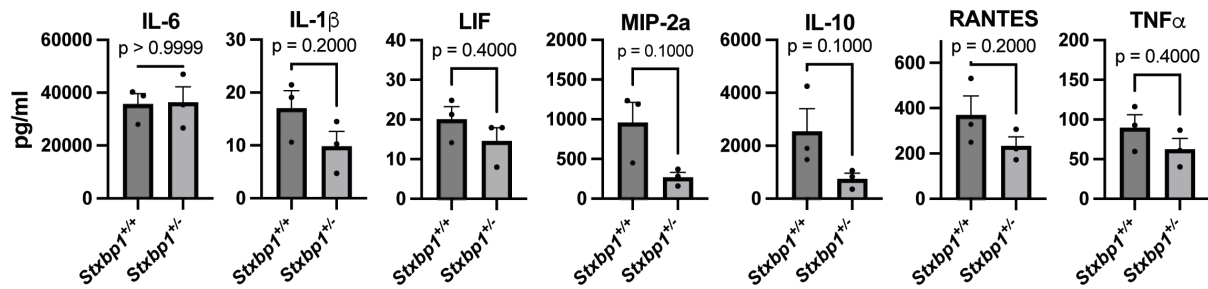

**Supplementary Figure 3:** Polymicrobial sepsis was induced by puncture of the cecum in *Stxbp1*<sup>+/+</sup> and *Stxbp1*<sup>+/-</sup> mice. The release of IL-6, IL-1β, LIF, MIP-2a, IL-10, RANTES, and TNFα was quantified 16 h after CLP operation. P-values determined by ordinary one-way ANOVA with Tukey's multiple comparisons test (SEM; *n*=3, mice per group).

### Supplemental Figure 4

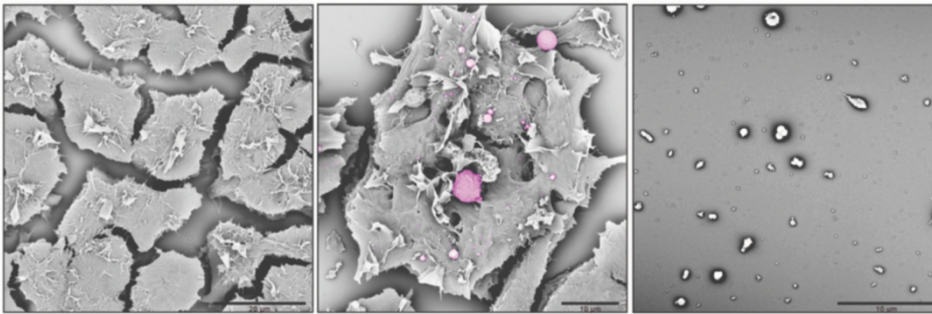

**Supplementary Figure 4:** Representative SEM pictures of HEK293 cells (*left panel*), EVs attaching (*marked in magenta pseudo colors*) to HEK293 cells (*middle panel*), and isolated EVs are shown (*right panel*). Scale bar corresponds to 20 μm (*left panel*) and 10 μm (*middle*) and (*right panel*). (*n*=2 of different measurements).

## Supplemental Figure 5

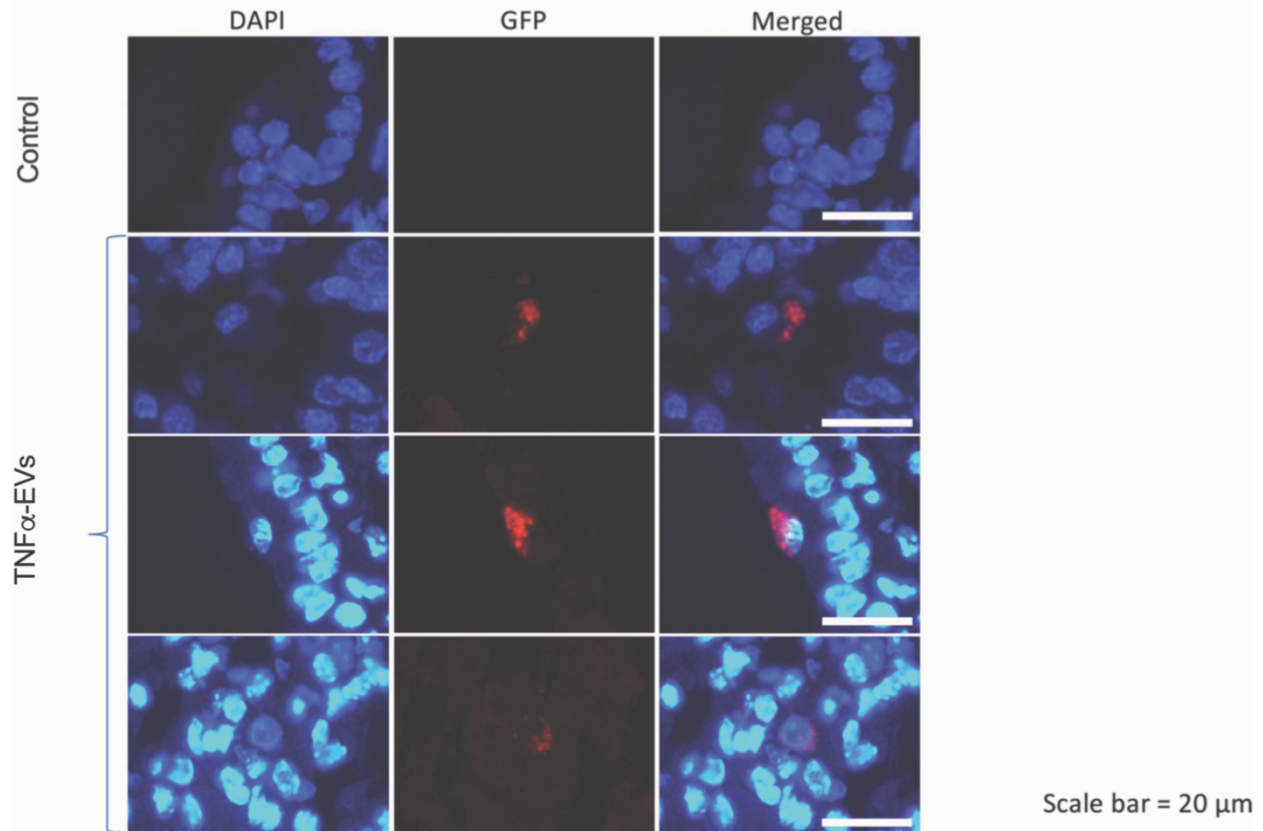

**Supplementary Figure 5:** Immunofluorescence images of figure 6. Mice were challenged with TNFR1-GFP EVs isolated from TNFR1 GFP stable cells that were stimulated with TNF $\alpha$  overnight (*EVs from 200 million cells/mouse*). Thirty minutes after EV challenge lung samples were collected and analyzed by immunostaining. The nuclei of the cells in the lung tissue of a non-challenged mouse (*left panel*) and lung tissue from a EV challenged mouse (*middle panel*) were counterstained with DAPI (*blue*) and EVs were visualized with anti GFP AF594 (*red*). Scale bar corresponds to 20  $\mu$ m (*n=3 of different measurements*).

## Supplemental Figure 6

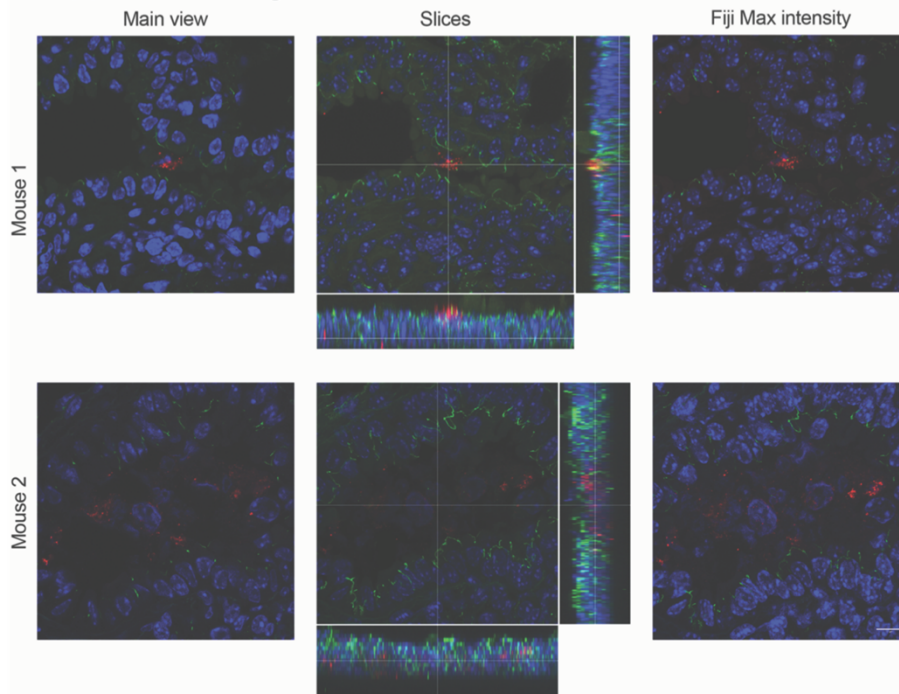

**Supplementary Figure 6:** Confocal images of figure 6. Confocal image (*right panel*) with EVs (*red*) and plasma membrane marker ZO-1 (*green*) (epithelial and endothelial cells). The nuclei are counterstained with DAPI (*blue*). Scale bar corresponds to 10  $\mu\text{m}$  ( $n=3$  of different measurements).

# Supplementary Figure 7

A

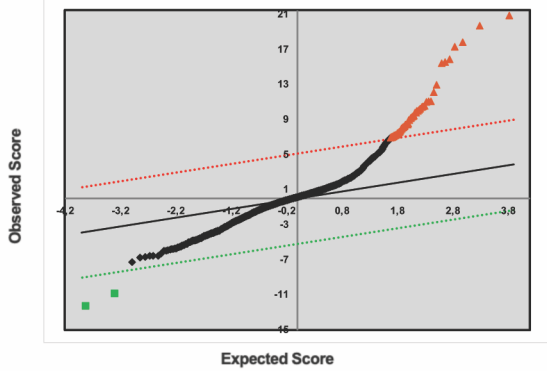

B

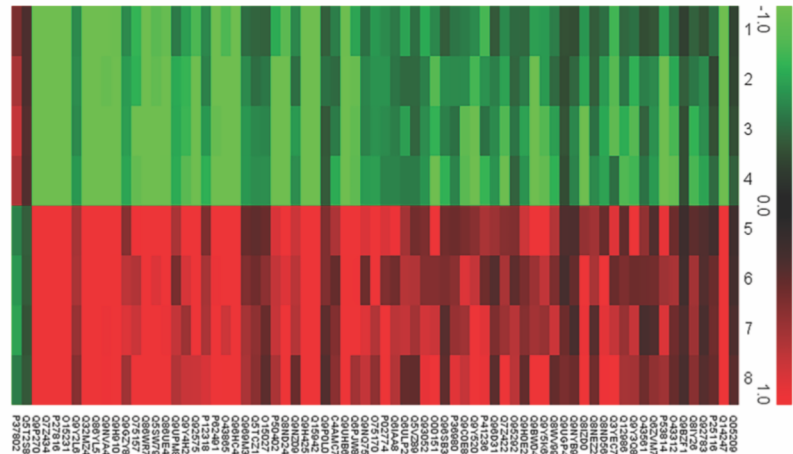

**Supplementary Figure 7: A.** Significance analysis of microarrays (SAM). Significance analysis of microarrays analysis was performed to compare proteome sample isolates collected from polytrauma and sepsis patients. Over-expressed proteins are illustrated in red, down-regulated proteins are depicted in green. In total 68 proteins were found over-expressed, and 2 proteins were down-regulated (*q-value* 0%, *fold-change* > 4.0). **B.** Heatmap. Red indicates highly expressed proteins and Green indicates lower expressed proteins with 4-fold change. Data points 1-4 are values from EVs isolated from polytrauma patients and 5-8 from EVs isolated from sepsis patients.
