# Supplementary material for: The role of extracellular vesicle fusion with target cells in triggering systemic inflammation
Source: PubMed Central journal article supplement (PMC10850166; doi:10.1038/s41467-024-45125-1), 2024-02-07
Supplement: 41467_2024_45125_MOESM3_ESM.pdf [file 41467_2024_45125_MOESM3_ESM.pdf]

## Reporting Summary

Nature Portfolio wishes to improve the reproducibility of the work that we publish. This form provides structure for consistency and transparency in reporting. For further information on Nature Portfolio policies, see our [Editorial Policies](#) and the [Editorial Policy Checklist](#).

### Statistics

For all statistical analyses, confirm that the following items are present in the figure legend, table legend, main text, or Methods section.

- |                                     |                                                                                                                                                                                                                                                                                                |
|-------------------------------------|------------------------------------------------------------------------------------------------------------------------------------------------------------------------------------------------------------------------------------------------------------------------------------------------|
| n/a                                 | Confirmed                                                                                                                                                                                                                                                                                      |
| <input type="checkbox"/>            | <input checked="" type="checkbox"/> The exact sample size ( $n$ ) for each experimental group/condition, given as a discrete number and unit of measurement                                                                                                                                    |
| <input type="checkbox"/>            | <input checked="" type="checkbox"/> A statement on whether measurements were taken from distinct samples or whether the same sample was measured repeatedly                                                                                                                                    |
| <input type="checkbox"/>            | <input checked="" type="checkbox"/> The statistical test(s) used AND whether they are one- or two-sided<br><i>Only common tests should be described solely by name; describe more complex techniques in the Methods section.</i>                                                               |
| <input checked="" type="checkbox"/> | <input type="checkbox"/> A description of all covariates tested                                                                                                                                                                                                                                |
| <input type="checkbox"/>            | <input checked="" type="checkbox"/> A description of any assumptions or corrections, such as tests of normality and adjustment for multiple comparisons                                                                                                                                        |
| <input type="checkbox"/>            | <input checked="" type="checkbox"/> A full description of the statistical parameters including central tendency (e.g. means) or other basic estimates (e.g. regression coefficient) AND variation (e.g. standard deviation) or associated estimates of uncertainty (e.g. confidence intervals) |
| <input type="checkbox"/>            | <input checked="" type="checkbox"/> For null hypothesis testing, the test statistic (e.g. $F$ , $t$ , $r$ ) with confidence intervals, effect sizes, degrees of freedom and $P$ value noted<br><i>Give <math>P</math> values as exact values whenever suitable.</i>                            |
| <input checked="" type="checkbox"/> | <input type="checkbox"/> For Bayesian analysis, information on the choice of priors and Markov chain Monte Carlo settings                                                                                                                                                                      |
| <input checked="" type="checkbox"/> | <input type="checkbox"/> For hierarchical and complex designs, identification of the appropriate level for tests and full reporting of outcomes                                                                                                                                                |
| <input checked="" type="checkbox"/> | <input type="checkbox"/> Estimates of effect sizes (e.g. Cohen's $d$ , Pearson's $r$ ), indicating how they were calculated                                                                                                                                                                    |

Our web collection on [statistics for biologists](#) contains articles on many of the points above.

### Software and code

Policy information about [availability of computer code](#)

#### Data collection

Gel electrophoresis, ChemiDoc™ Imaging System (Bio-Rad).  
Absorbance at different wavelength, Wal Iac 1420 Workstation Software version 3.00.  
Flow cytometry using a Beckman Coulter Cytoflex (Beckman).  
qPCR, The Applied Biosystems™ TaqMan™ Pre-Developed Assay Reagents from Thermo Fisher.  
SEM images, PHENOM PROX scanning electron microscope.  
Confocal images were acquired and processed with NIS-elements, version: 4.60.02, (Laboratory Imaging, Nikon, Tokyo, Japan).

#### Data analysis

GraphPad Prism 9.0 (GraphPad Software, San Diego, CA).  
MS raw data files for the TMT set were merged for relative quantification and identification using Proteome Discoverer version 1.4 (Thermo Fisher Scientific). A database search for each set was performed with the Mascot search engine (Matrix Science) using the Homo Sapiens Swissprot database, version Mars 2017 with 553941 sequences. MS peptide tolerance of 5 ppm and MS/MS tolerance for identification of 600 millimass units (mmu), tryptic peptides with zero missed cleavage and variable modifications of methionine oxidation, fixed modifications of cysteine alkylation, N-terminal TMT-label and lysine TMT-label were selected. The detected peptide threshold in the software was set to a significance of FDR 1% by searching against a reversed database and identified proteins were grouped by sharing the same sequences to minimize redundancy. For TMT quantification, the ratios of the TMT reporter ion intensities in HCD MS/MS spectra ( $m/z$  126-131) from raw data sets were used. Ratios were derived by Proteome Discoverer using the following criteria: fragment ion tolerance as 3 mmu for the centroid peak with smallest delta mass and minimum intensity of 2000. Only peptides unique for a given protein were considered for relative quantitation, excluding those common to other isoforms or proteins of the same family. The quantification was normalized using the protein median. Calculations of the ratios were made by using a reference samples made from a mix of 4 of the samples or the control sample as

denominator.

Gene ontology (GO) enrichment analysis was performed using the Enrichr, a web-based tool providing various types of visualization summaries of collective functions of protein lists.

For manuscripts utilizing custom algorithms or software that are central to the research but not yet described in published literature, software must be made available to editors and reviewers. We strongly encourage code deposition in a community repository (e.g. GitHub). See the Nature Portfolio [guidelines for submitting code & software](#) for further information.

## Data

Policy information about [availability of data](#)

All manuscripts must include a [data availability statement](#). This statement should provide the following information, where applicable:

- Accession codes, unique identifiers, or web links for publicly available datasets
- A description of any restrictions on data availability
- For clinical datasets or third party data, please ensure that the statement adheres to our [policy](#)

The experimental data that support the findings of this work are available as Source Data.

All proteomics data in the study have been made public. The mass spectrometry proteomics data have been deposited to the ProteinXchange Consortium via the PRIDE partner repository, .....

## Research involving human participants, their data, or biological material

Policy information about studies with [human participants or human data](#). See also policy information about [sex, gender \(identity/presentation\), and sexual orientation](#) and [race, ethnicity and racism](#).

|                                                                    |                                                                                                                                                                                                                                                                                                                                                                |
|--------------------------------------------------------------------|----------------------------------------------------------------------------------------------------------------------------------------------------------------------------------------------------------------------------------------------------------------------------------------------------------------------------------------------------------------|
| Reporting on sex and gender                                        | The study design did not specifically consider sex and gender as a factor. No separate data analysis for males and females was performed.                                                                                                                                                                                                                      |
| Reporting on race, ethnicity, or other socially relevant groupings | NA                                                                                                                                                                                                                                                                                                                                                             |
| Population characteristics                                         | NA                                                                                                                                                                                                                                                                                                                                                             |
| Recruitment                                                        | NA                                                                                                                                                                                                                                                                                                                                                             |
| Ethics oversight                                                   | Informed consent was obtained from the patients, or the guardians included in this study. Samples from Helsingborg Hospital ICU were approved by the Ethics committee in Lund Dnr. 2015/467 and 2019/04558 and samples from Charles-University Prague were approved by the Ethics Committee of the Military University Hospital Prague Dnr. 108/9-36/2016-UVN. |

Note that full information on the approval of the study protocol must also be provided in the manuscript.

## Field-specific reporting

Please select the one below that is the best fit for your research. If you are not sure, read the appropriate sections before making your selection.

Life sciences  Behavioural & social sciences  Ecological, evolutionary & environmental sciences

For a reference copy of the document with all sections, see [nature.com/documents/nr-reporting-summary-flat.pdf](https://www.nature.com/documents/nr-reporting-summary-flat.pdf)

## Life sciences study design

All studies must disclose on these points even when the disclosure is negative.

|                 |                                                                                                                                                                                                                                                                                                                                                                                                    |
|-----------------|----------------------------------------------------------------------------------------------------------------------------------------------------------------------------------------------------------------------------------------------------------------------------------------------------------------------------------------------------------------------------------------------------|
| Sample size     | No statistical methods were used to predetermine sample size estimates. Sample size was determined based on standards in the field and experiments to obtain statistical significance and reproducibility. At least triplicates were used to meet the minimal requirements for statistical analysis and the detailed sample size was demonstrated in the figure legends.                           |
| Data exclusions | No data was excluded from analysis.                                                                                                                                                                                                                                                                                                                                                                |
| Replication     | To ensure the replication of the findings, experiments were repeated at different times as indicated in the figure legends. All experimental data was reliably reproduced in multiple independent experiments. For in vivo experiments, multiple mouse experiments were performed to ensure reproducibility, the exact number of animals was shown in the figure legends or as dots in the graphs. |
| Randomization   | Animals were randomized according to the cage housing the animals.                                                                                                                                                                                                                                                                                                                                 |
| Blinding        | The experiments were performed with single-blindly.                                                                                                                                                                                                                                                                                                                                                |

# Reporting for specific materials, systems and methods

We require information from authors about some types of materials, experimental systems and methods used in many studies. Here, indicate whether each material, system or method listed is relevant to your study. If you are not sure if a list item applies to your research, read the appropriate section before selecting a response.

## Materials & experimental systems

| n/a                                 | Involvement                                                     |
|-------------------------------------|-----------------------------------------------------------------|
| <input type="checkbox"/>            | <input checked="" type="checkbox"/> Antibodies                  |
| <input type="checkbox"/>            | <input checked="" type="checkbox"/> Eukaryotic cell lines       |
| <input checked="" type="checkbox"/> | <input type="checkbox"/> Palaeontology and archaeology          |
| <input type="checkbox"/>            | <input checked="" type="checkbox"/> Animals and other organisms |
| <input checked="" type="checkbox"/> | <input type="checkbox"/> Clinical data                          |
| <input checked="" type="checkbox"/> | <input type="checkbox"/> Dual use research of concern           |
| <input checked="" type="checkbox"/> | <input type="checkbox"/> Plants                                 |

## Methods

| n/a                                 | Involvement                                        |
|-------------------------------------|----------------------------------------------------|
| <input checked="" type="checkbox"/> | <input type="checkbox"/> ChIP-seq                  |
| <input type="checkbox"/>            | <input checked="" type="checkbox"/> Flow cytometry |
| <input checked="" type="checkbox"/> | <input type="checkbox"/> MRI-based neuroimaging    |

## Antibodies

### Antibodies used

The following antibodies were used in the study:  
 CD66b-FITC (Cat# 305104; Clone: G10FS, BD Bioscience)  
 CD42b-PE-Cy5 (Cat# 551141; Clone: HI Pl, BD Bioscience)  
 CD14-BV421 (Cat# 301830; Clone: HCD14, Biolegend)  
 anti-IL1R1 antibody (Cat# sc-393998; Santa Cruz)  
 anti-pIRAK4 (Cat#11927; Cell signaling Technology)  
 anti-MyD88 (Cat#4283; Cell signaling Technology)  
 anti-pIRAK4, (Cat#11927; Cell signaling Technology)  
 anti-pTRAF2 antibodies (Cat#13908; Cell signaling Technology)  
 anti-TRADD antibodies (Cat# sc-46653; Santa Cruz)  
 anti-Munc 18-1 or STXBPI (Cat#ab3451; Abcam)  
 horseradish peroxidase-conjugated goat anti-rabbit IgG (Cat#172-1019; Bio-Rad)  
 anti-GAPDH (10494-1-AP; Proteintech)

### Validation

All antibodies were validated by vendors:

CD66b-FITC; <https://www.citeab.com/antibodies/521451-305104-fitc-anti-human-cd66b-g10f5-monoclonal?des=b8239f6ace2d47f0>  
 CD42b-PE-Cy5; <https://www.citeab.com/antibodies/2412461-551141-bd-pharmingen-pe-cy-5-mouse-anti-human-cd42b?des=334b657cd46f3e78>  
 CD14-BV421; <https://www.biolegend.com/ja-jp/products/brilliant-violet-421-anti-human-cd14-antibody-7321?GroupID=BLG4926>  
 anti-IL1R1 antibody; <https://www.scbt.com/p/il-1ri-antibody-h-8>  
 anti-pIRAK4; <https://www.cellsignal.com/products/primary-antibodies/phospho-irak4-thr345-ser346-d6d7-rabbit-mab/11927>  
 anti-MyD88; <https://www.cellsignal.com/products/primary-antibodies/myd88-d80f5-rabbit-mab/4283>  
 anti-pIRAK4; <https://www.cellsignal.com/products/primary-antibodies/phospho-irak4-thr345-ser346-d6d7-rabbit-mab/11927>  
 anti-pTRAF2; <https://www.cellsignal.com/products/primary-antibodies/phospho-traf2-ser11-e2b6l-rabbit-mab/13908>  
 anti-TRADD; <https://www.scbt.com/p/tradd-antibody-a-5?requestFrom=search>  
 anti-Munc 18-1; <https://www.abcam.com/en-se/products/primary-antibodies/munc18-1-antibody-ab3451>  
 anti-GAPDH; <https://www.ptglab.com/products/GAPDH-Antibody-10494-1-AP.htm>

## Eukaryotic cell lines

Policy information about [cell lines and Sex and Gender in Research](#)

### Cell line source(s)

HEK293 (ATCC® CRL-1573™) was purchased from American Type Culture Collection.  
 RAW-Blue™, THP1-Dual™, THP-1-Dual™ KO-MyD88, HEK-Dual™ TNFα, HEK-Blue™ IL-1b, and HEK-Blue™ IL-10 reporter cells (hkb-TNFα, hkb-il1r, and hkb-il10) were obtained from InvivoGen, San Diego, CA, USA.

### Authentication

All cell lines are authenticated by InvivoGen and ATCC. No further validation was performed.

### Mycoplasma contamination

All cell lines were tested negative for mycoplasma contamination by InvivoGen and ATCC.

### Commonly misidentified lines (See [ICLAC](#) register)

We did not use a commonly misidentified cell line in this study.

## Animals and other research organisms

Policy information about [studies involving animals](#); [ARRIVE guidelines](#) recommended for reporting animal research, and [Sex and Gender in Research](#)

|                         |                                                                                                                                                                                    |
|-------------------------|------------------------------------------------------------------------------------------------------------------------------------------------------------------------------------|
| Laboratory animals      | BALB/c and C57Bl6 (Stxbpl +/+ & Stxbpl +/- mice) (female, 6-9 weeks).                                                                                                              |
| Wild animals            | No wild animal were involved in this study.                                                                                                                                        |
| Reporting on sex        | Gender was not considered in the data analysis.                                                                                                                                    |
| Field-collected samples | Not involved.                                                                                                                                                                      |
| Ethics oversight        | Animal experiments were performed according to protocols approved by the Local Ethics Committee at Lund University (Malmö-Lunds djurförsöksetiskanämnd: Dnr 5.8.18-18-01753/2022). |

Note that full information on the approval of the study protocol must also be provided in the manuscript.

## Flow Cytometry

### Plots

Confirm that:

- The axis labels state the marker and fluorochrome used (e.g. CD4-FITC).
- The axis scales are clearly visible. Include numbers along axes only for bottom left plot of group (a 'group' is an analysis of identical markers).
- All plots are contour plots with outliers or pseudocolor plots.
- A numerical value for number of cells or percentage (with statistics) is provided.

### Methodology

|                           |                                                                                                                                                                                                                                                                                                                                                                                                                                                                                                                                                                                                                                                                                                                                                                                                                                                                                                                                                                                                                                                               |
|---------------------------|---------------------------------------------------------------------------------------------------------------------------------------------------------------------------------------------------------------------------------------------------------------------------------------------------------------------------------------------------------------------------------------------------------------------------------------------------------------------------------------------------------------------------------------------------------------------------------------------------------------------------------------------------------------------------------------------------------------------------------------------------------------------------------------------------------------------------------------------------------------------------------------------------------------------------------------------------------------------------------------------------------------------------------------------------------------|
| Sample preparation        | CD42b receptor transfer to neutrophils and monocytes cell surface was investigated by flow cytometry using a Beckman Coulter Cytoflex (Beckman). Citrated blood from five healthy donors was incubated with 0.5 µg/ml E. coli O111:B4 LPS (Sigma-Aldrich) for 15 min at 37 °C. 100 µl of blood was used and red blood cells were lysed with a BD Phosflow Lyse/Fix 5X. After lysis, samples were washed once with 0.5% BSA in PBS and incubated with CD66b-FITC (Clone: G10F5, BD Bioscience), CD42b-PE-Cy5 (Clone: HIP1, BD Bioscience) and CD14-BV421 (Clone: HCD14, BioLegend) antibodies were added (1:50) to the cell suspension and incubated for 60 min at 37 °C in the dark. For one donor, the manual gating analysis using FMO, and gating controls was carried out. Samples were washed once with 0.5% BSA in PBS and the cell pellet was resuspended in 300 µl of washing buffer. The percentage of CD42b on the cell surface was calibrated with control cells that were not treated with LPS. The results are presented as mean values ± s.e.m. |
| Instrument                | Beckman Coulter Cytoflex (Beckman)                                                                                                                                                                                                                                                                                                                                                                                                                                                                                                                                                                                                                                                                                                                                                                                                                                                                                                                                                                                                                            |
| Software                  | CytExpert                                                                                                                                                                                                                                                                                                                                                                                                                                                                                                                                                                                                                                                                                                                                                                                                                                                                                                                                                                                                                                                     |
| Cell population abundance | Cell sorting was not employed                                                                                                                                                                                                                                                                                                                                                                                                                                                                                                                                                                                                                                                                                                                                                                                                                                                                                                                                                                                                                                 |
| Gating strategy           | For one donor, using the FSC/SSC gating, debris was removed by gating on the main cell population. The manual gating analysis using FMO, and gating controls was carried out.                                                                                                                                                                                                                                                                                                                                                                                                                                                                                                                                                                                                                                                                                                                                                                                                                                                                                 |

- Tick this box to confirm that a figure exemplifying the gating strategy is provided in the Supplementary Information.
